# Supplementary material for: Humidity-responsive molecular gate-opening mechanism for gas separation in ultraselective nanocellulose/IL hybrid membranes
Source: Royal Society of Chemistry journal article supplement (doi:10.1039/d0gc00544d), 2020-01-01
Supplement: d0gc00544d1.pdf [file d0gc00544d1.pdf]

## Supporting information

### Humidity-Responsive Molecular Gate-Opening Mechanism for Gas Separation in Ultrasensitive Nanocellulose/IL Hybrid Membranes

*Saravanan Janakiram, Luca Ansaloni, Soo-Ah Jin, Xinyi Yu, Zhongde Dai,  
Richard J. Spontak and Liyuan Deng*

#### Surface analysis

Surface analysis of hybrid NFC/IL films was performed by XPS, and corresponding spectra are displayed in **Figure S1**. The relative atomic ratios reported in the main text are obtained from the areas under the individual element-specific ionization peaks.

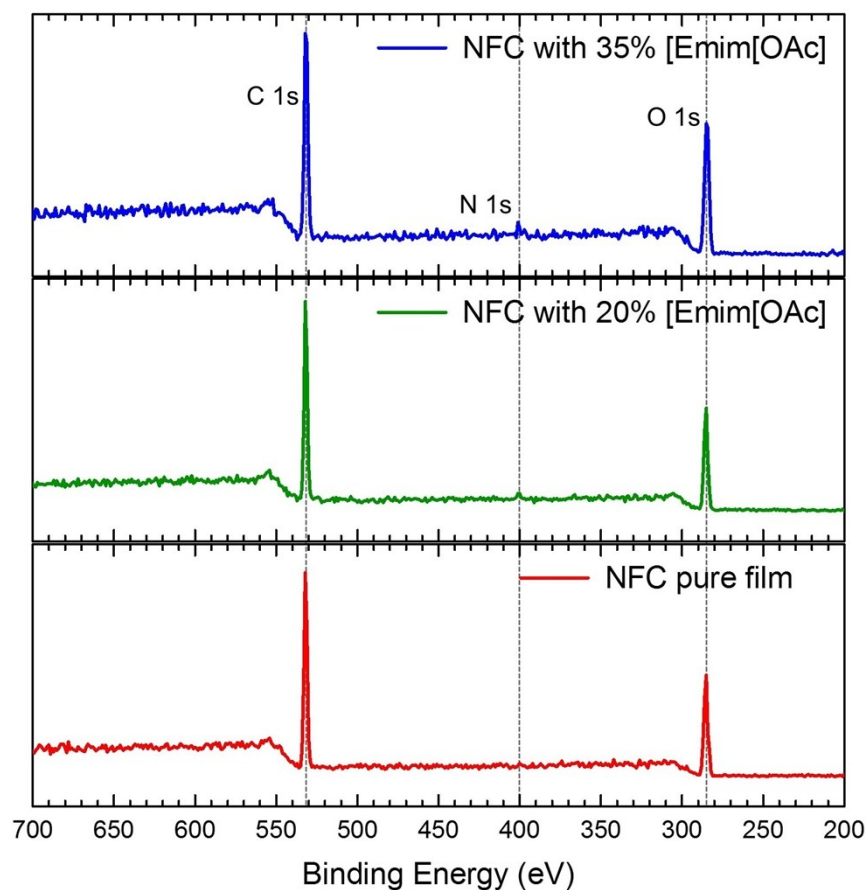

**Figure S1.** XPS spectra acquired from neat NFC and hybrid NFC/IL films (labeled). Also identified are the C 1s, N 1s and O 1s ionization peaks (labeled with dashed vertical lines).

## Dynamic mechanical analysis (DMA)

Free-standing NFC and NFC/IL films with different IL loading levels, prepared according to the procedure in the main text and cut into strips measuring 2 cm x 1 cm with a laser cutter, have been analyzed by DMA in a TA Instruments RSA III instrument operated in tensile mode at a strain amplitude of 0.5%. The dynamic storage and loss moduli ( $E'$  and  $E''$ , respectively) have been measured as a function of frequency at ambient temperature. The frequency spectra presented in **Figure S2** confirm that the membranes behave as solid-like materials wherein  $E' > E''$  over the entire frequency range examined. Moreover, the two IL-containing specimens can, for the most part, be considered physical gels, since  $E'$  and  $E''$  are parallel (the increases in the low-frequency results for the film with 35 wt% IL suggest that a crossover might occur at lower frequencies, indicating a long, but not infinite, relaxation time).

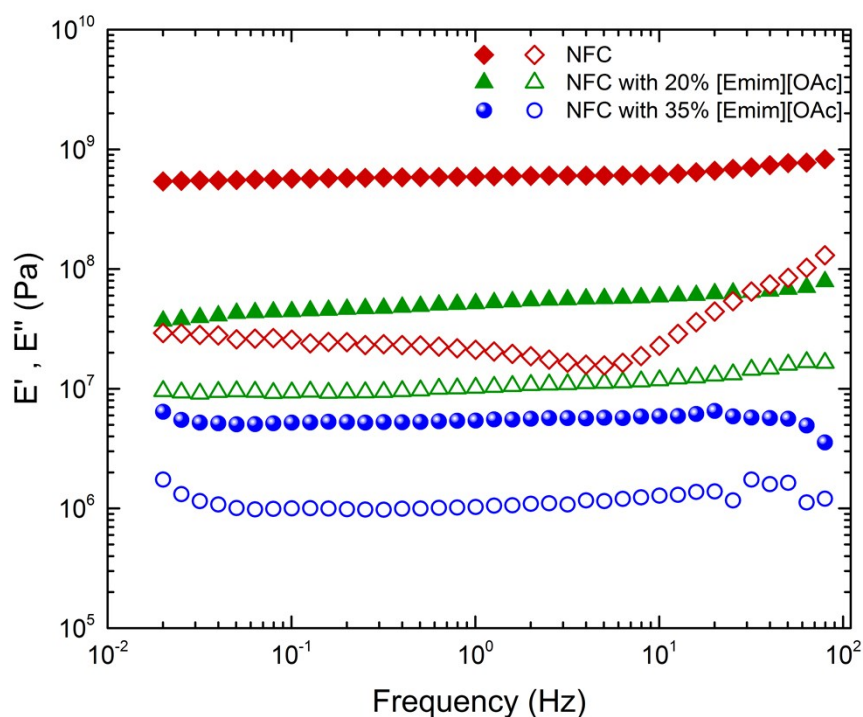

**Figure S2.** Frequency spectra of the dynamic tensile moduli ( $E'$ , filled symbols, and  $E''$ , open symbols) for neat NFC and hybrid NFC/IL films (see legend for specimen details) at ambient temperature.

## X-ray diffractometry (XRD)

Free-standing NFC and NFC/IL films with different IL loading levels have also been examined by XRD at ambient temperature in a Bruker D8 A25 DaVinci X-ray diffractometer equipped with a rotating  $\text{CuK}\alpha$  anode. The Crystallinity Index (CrI) of all the materials investigated is calculated according to the method proposed by Segal *et al.*<sup>1</sup> The results of this analysis are summarized in **Figure S3**. The inherent NFC crystallinity due to interfibrillar H-bonding appears to be disrupted due to the addition of IL that orients along the nanofibrillar surfaces.

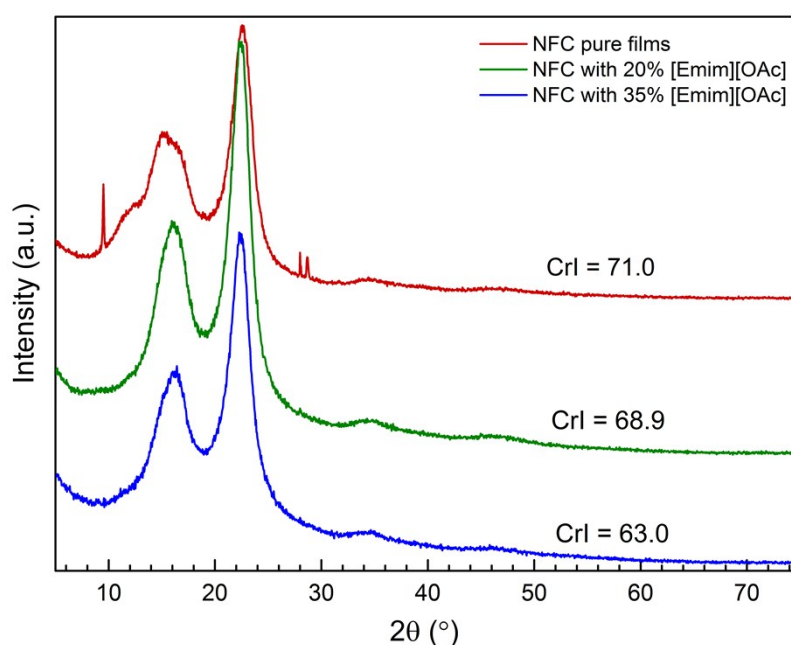

**Figure S3.** XRD profiles collected from neat NFC and hybrid NFC/IL films (see legend for specimen details) at ambient temperature. Calculated CrI values are included for comparison.

## Gas sorption

Gravimetric sorption analysis conducted on pre-dried and desorbed self-standing films employ dry gases instead of humidified gases since the presence of water induces membrane swelling and specimen volume changes at different experimental conditions.<sup>2</sup> A series of  $\text{CO}_2$  sorption isotherms is displayed as a function of pressure for NFC and NFC/IL films in **Figure**

S4A and confirms, as implied by the permeabilities included in **Figure 6**, that the CO<sub>2</sub> sorption capacity increases with increasing IL loading level. Differences in CO<sub>2</sub> sorption become pronounced at high pressures where the NFC acts as a typical polymeric matrix exhibiting dual-mode sorption behavior.<sup>3</sup> Incorporation of [Emim][OAc] into NFC visibly alters the curvature of the isotherms.<sup>4</sup>

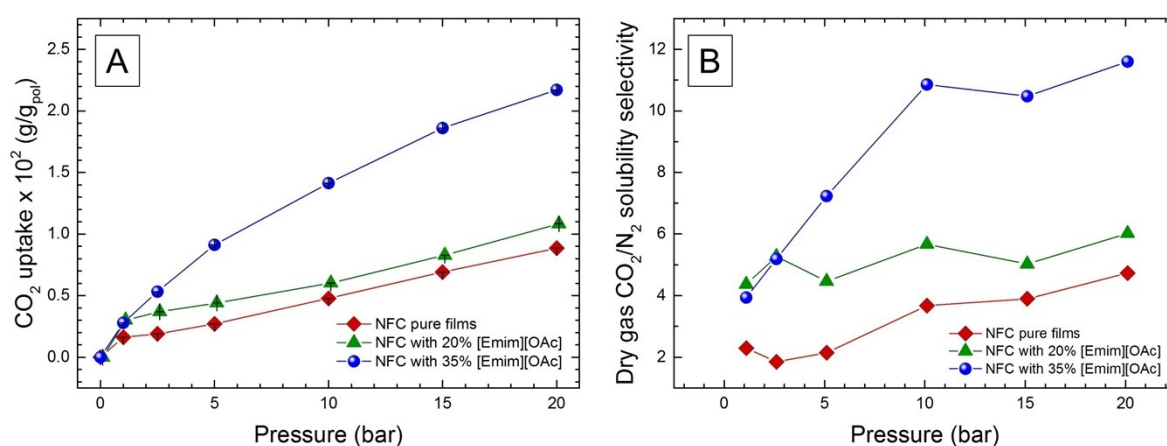

**Figure S4.** (A) Dry-gas CO<sub>2</sub> sorption isotherms and (B) solubility selectivity for neat NFC and hybrid NFC/IL films (see legend for specimen details) at 35°C. The solid lines serve to connect the data, and the error bars correspond to the standard error in the data.

Similarly, the sorption capacity of N<sub>2</sub> has been measured so that the corresponding CO<sub>2</sub>/N<sub>2</sub> solubility selectivity could be directly ascertained (*cf.* **Figure S4B**). Contrary to expectation, addition of IL to NFC appears to have a relatively small influence on solubility selectivity in hybrid NFC/IL films, increasing CO<sub>2</sub>/N<sub>2</sub> from *ca.* 2 to 4 in NFC and from *ca.* 4 to 11 in films containing 35 wt% [Emim][OAc]. Although the effect of IL loading on CO<sub>2</sub>/N<sub>2</sub> solubility selectivity is not clear at very low pressures (due to low uptake of N<sub>2</sub>), the overall trend remains evident at higher pressures.

### Permeation stability test

Results from the stability analysis mentioned as a requirement for commercial application

in the main text are provided over the course of 30 h at 35°C in **Figure S5A**. Complementary SEM images of the surface and cross-section of the corresponding membrane after long-time testing are displayed together in **Figure S5B** and indicate no obvious morphological changes after the permeation tests, as expected.

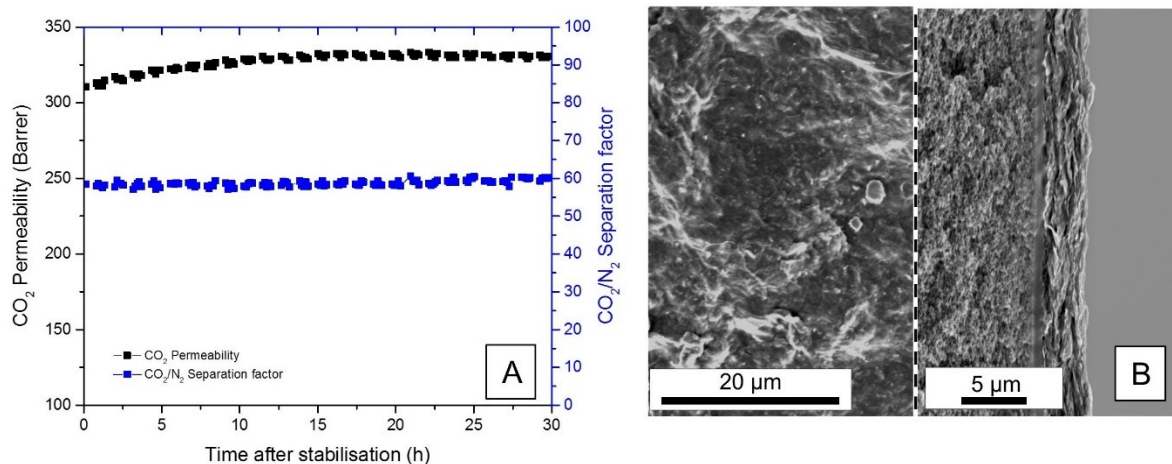

**Figure S5.** (A) Stability analysis of humidified mixed-gas CO<sub>2</sub> permeability (black, left axis) and CO<sub>2</sub>/N<sub>2</sub> separation factor (blue, right axis) for NFC/IL membranes with 50 wt% [Emim][OAc] measured at 35°C and 1.7 bar. (B) SEM images of the membrane surface (left of white dashed line) and cross-section (right of white dashed line) acquired from the membrane after testing.

## References

- 1 L. Segal, J. J. Creely, A. E. Martin Jr. and C. M. Conrad, *Text. Res. J.*, 1959, 786–794.
- 2 H. Bux, C. Chmelik, J. M. Van Baten, R. Krishna and J. Caro, *Adv. Mater.*, 2010, **22**, 4741–4743.
- 3 I. Kikic, M. Lora, A. Cortesi and P. Sist, *Fluid Phase Equilib.*, 1999, **158**, 913–921.
- 4 A. Yokozeki, M. B. Shiflett, C. P. Junk, L. M. Grieco and T. Foo, *J. Phys. Chem. B*, 2008, **112**, 16654–16663.
